# Supplementary material for: Potential of Trichoderma harzianum and Its Metabolites to Protect Wheat Seedlings against Fusarium culmorum and 2,4-D
Source: MDPI journal article supplement (doi:10.3390/ijms222313058), 2021-12-02
Supplement: s1 [file s1]

## Supplementary material

**Table S1.** Comparison of ANOVA Tukey post-hoc results for shoot and root lengths, with treatment as a factor, (T.h. – *Trichoderma harzianum*, F.c.- *Fusarium culmorum*, ex. T.h – *T. harzianum* extracellular metabolites treated wheat seeds), p significance was shown: \* -  $p \leq 0.001$ , ns – not significant.

|                   | ANOVA result for shoot length |         |      |           |      |           |           |                |         |              |              |                   |
|-------------------|-------------------------------|---------|------|-----------|------|-----------|-----------|----------------|---------|--------------|--------------|-------------------|
|                   | Control                       | 2,4D    | T.h. | T.h.+2,4D | F.c. | F.c.+2,4D | T.h.+F.c. | T.h.+F.c.+2,4D | ex.T.h. | ex.T.h.+2,4D | ex.T.h.+F.c. | ex.T.h.+F.c.+2,4D |
| Control           |                               | *       | *    | *         | *    | *         | ns        | ns             | *       | *            | *            | *                 |
| 2,4D              | *                             |         | *    | ns        | ns   | ns        | *         | *              | *       | ns           | ns           | ns                |
| T.h.              | *                             | *       |      | *         | *    | *         | ns        | *              | ns      | *            | *            | *                 |
| T.h.+2,4D         | *                             | ns      | *    |           | ns   | ns        | *         | ns             | *       | ns           | ns           | ns                |
| F.c.              | *                             | ns      | *    | ns        |      | ns        | *         | ns             | *       | ns           | ns           | ns                |
| F.c.+2,4D         | *                             | ns      | *    | ns        | ns   |           | *         | *              | *       | ns           | ns           | ns                |
| T.h.+F.c.         | ns                            | *       | ns   | *         | *    | *         |           | *              | ns      | *            | *            | *                 |
| T.h.+F.c.+2,4D    | ns                            | *       | *    | ns        | ns   | *         | *         |                | *       | ns           | *            | ns                |
| ex.T.h.           | *                             | *       | ns   | *         | *    | *         | ns        | *              |         | *            | *            | *                 |
| ex.T.h.+2,4D      | *                             | ns      | *    | ns        | ns   | ns        | *         | ns             | *       |              | ns           | ns                |
| ex.T.h.+F.c.      | *                             | ns      | *    | ns        | ns   | ns        | *         | *              | *       | ns           |              | ns                |
| ex.T.h.+F.c.+2,4D | *                             | ns      | *    | ns        | ns   | ns        | *         | ns             | *       | ns           | ns           |                   |
|                   | ANOVA result for root length  |         |      |           |      |           |           |                |         |              |              |                   |
|                   | 2,4D                          | Control | T.h. | T.h.+2,4D | F.c. | F.c.+2,4D | T.h.+F.c. | T.h.+F.c.+2,4D | ex.T.h. | ex.T.h.+2,4D | ex.T.h.+F.c. | ex.T.h.+F.c.+2,4D |
| 2,4D              |                               | *       | *    | ns        | *    | ns        | *         | ns             | *       | ns           | *            | ns                |
| Control           | *                             |         | *    | *         | *    | *         | ns        | *              | ns      | *            | *            | *                 |
| T.h.              | *                             | *       |      | *         | *    | *         | *         | *              | *       | *            | *            | *                 |
| T.h.+2,4D         | ns                            | *       | *    |           | *    | ns        | *         | ns             | *       | ns           | *            | ns                |
| F.c.              | *                             | *       | *    | *         |      | *         | *         | *              | *       | *            | ns           | *                 |
| F.c.+2,4D         | ns                            | *       | *    | ns        | *    |           | *         | ns             | *       | ns           | *            | ns                |
| T.h.+F.c.         | *                             | ns      | *    | *         | *    | *         |           | *              | ns      | *            | *            | *                 |
| T.h.+F.c.+2,4D    | ns                            | *       | *    | ns        | *    | ns        | *         |                | *       | ns           | *            | ns                |
| ex.T.h.           | *                             | ns      | *    | *         | *    | *         | ns        | *              |         | *            | *            | *                 |
| ex.T.h.+2,4D      | ns                            | *       | *    | ns        | *    | ns        | *         | ns             | *       |              | *            | ns                |
| ex.T.h.+F.c.      | *                             | *       | *    | *         | ns   | *         | *         | *              | *       | *            |              | *                 |
| ex.T.h.+F.c.+2,4D | ns                            | *       | *    | ns        | *    | ns        | *         | ns             | *       | ns           | *            |                   |

**Table S2.** Comparison of ANOVA Tukey post-hoc results for seeds germination with treatment as a factor, (T.h. – *Trichoderma harzianum*, F.c.- *Fusarium culmorum*, ex. T.h – *T. harzianum* extracellular metabolites treated wheat seeds), p significance was shown: \* -  $p \leq 0.001$ , ns – not significant.

|                   | ANOVA result for germination |      |      |           |      |           |           |                |         |              |              |                   |
|-------------------|------------------------------|------|------|-----------|------|-----------|-----------|----------------|---------|--------------|--------------|-------------------|
|                   | Control                      | 2,4D | T.h. | T.h.+2,4D | F.c. | F.c.+2,4D | T.h.+F.c. | T.h.+F.c.+2,4D | ex.T.h. | ex.T.h.+2,4D | ex.T.h.+F.c. | ex.T.h.+F.c.+2,4D |
| Control           |                              | ns   | ns   | ns        | *    | *         | *         | *              | ns      | ns           | *            | *                 |
| 2,4D              | ns                           |      | ns   | ns        | *    | *         | *         | *              | ns      | ns           | *            | *                 |
| T.h.              | ns                           | ns   |      | ns        | *    | *         | *         | *              | ns      | ns           | *            | *                 |
| T.h.+2,4D         | ns                           | ns   | ns   |           | *    | *         | *         | *              | ns      | ns           | *            | *                 |
| F.c.              | *                            | *    | *    | *         |      | ns        | ns        | ns             | *       | *            | ns           | ns                |
| F.c.+2,4D         | *                            | *    | *    | *         | ns   |           | ns        | ns             | *       | *            | ns           | ns                |
| T.h.+F.c.         | *                            | *    | *    | *         | ns   | ns        |           | ns             | *       | *            | ns           | ns                |
| T.h.+F.c.+2,4D    | *                            | *    | *    | *         | ns   | ns        | ns        |                | *       | *            | ns           | ns                |
| ex.T.h.           | ns                           | ns   | ns   | ns        | *    | *         | *         | *              |         | ns           | *            | *                 |
| ex.T.h.+2,4D      | ns                           | ns   | ns   | ns        | *    | *         | *         | *              | ns      |              | *            | *                 |
| ex.T.h.+F.c.      | *                            | *    | *    | *         | ns   | ns        | ns        | ns             | *       | *            |              | ns                |
| ex.T.h.+F.c.+2,4D | *                            | *    | *    | *         | ns   | ns        | ns        | ns             | *       | *            | ns           |                   |

**Table S3.** Comparison of ANOVA Tukey post-hoc results for RWC with treatment as a factor, (T.h. – *Trichoderma harzianum*, F.c.- *Fusarium culmorum*, ex. T.h – *T. harzianum* extracellular metabolites treated wheat seeds), p significance was shown\*  $p \leq 0.001$ , \*\*  $p \leq 0.0001$ , ns – not significant.

|                   | ANOVA result for RWC |      |      |           |      |           |           |                |         |              |              |                   |
|-------------------|----------------------|------|------|-----------|------|-----------|-----------|----------------|---------|--------------|--------------|-------------------|
|                   | Control              | 2,4D | T.h. | T.h.+2,4D | F.c. | F.c.+2,4D | T.h.+F.c. | T.h.+F.c.+2,4D | ex.T.h. | ex.T.h.+2,4D | ex.T.h.+F.c. | ex.T.h.+F.c.+2,4D |
| Control           |                      | *    | ns   | ns        | **   | **        | **        | **             | ns      | *            | **           | **                |
| 2,4D              | *                    |      | ns   | ns        | **   | **        | ns        | **             | *       | ns           | ns           | *                 |
| T.h.              | ns                   | ns   |      | ns        | **   | **        | **        | **             | ns      | ns           | *            | **                |
| T.h.+2,4D         | ns                   | ns   | ns   |           | **   | **        | **        | **             | ns      | ns           | ns           | **                |
| F.c.              | **                   | **   | **   | **        |      | ns        | **        | ns             | **      | **           | **           | **                |
| F.c.+2,4D         | **                   | **   | **   | **        | ns   |           | **        | ns             | **      | **           | **           | **                |
| T.h.+F.c.         | **                   | ns   | **   | **        | **   | **        |           | **             | **      | ns           | ns           | ns                |
| T.h.+F.c.+2,4D    | **                   | **   | **   | **        | ns   | ns        | **        |                | **      | **           | **           | **                |
| ex.T.h.           | ns                   | *    | ns   | ns        | **   | **        | **        | **             |         | ns           | *            | **                |
| ex.T.h.+2,4D      | *                    | ns   | ns   | ns        | **   | **        | ns        | **             | ns      |              | ns           | *                 |
| ex.T.h.+F.c.      | **                   | ns   | *    | ns        | **   | **        | ns        | **             | *       | ns           |              | ns                |
| ex.T.h.+F.c.+2,4D | **                   | *    | **   | **        | **   | **        | ns        | **             | **      | *            | ns           |                   |

**Table S4.** Comparison of ANOVA Tukey post-hoc results for chlorophyll content with treatment as a factor, (T.h. – *Trichoderma harzianum*, F.c.- *Fusarium culmorum*, ex. T.h – *T. harzianum* extracellular metabolites treated wheat seeds), p significance was shown: \*  $p \leq 0.001$ , \*\*  $p \leq 0.0001$ , ns – not significant.

[illegible]

**Table S5.** Comparison of ANOVA Tukey post-hoc results for JA with treatment as a factor, (T.h. – *Trichoderma harzianum*, F.c.- *Fusarium culmorum*, ex. T.h – *T. harzianum* extracellular metabolites treated wheat seeds), p significance was shown: \*\* -  $p \leq 0.001$ , \* -  $p \leq 0.01$ , ns – not significant.

|                   | ANOVA result for JA |      |      |           |      |           |           |                |         |              |              |                   |
|-------------------|---------------------|------|------|-----------|------|-----------|-----------|----------------|---------|--------------|--------------|-------------------|
|                   | Control             | 2,4D | T.h. | T.h.+2,4D | F.c. | F.c.+2,4D | T.h.+F.c. | T.h.+F.c.+2,4D | ex.T.h. | ex.T.h.+2,4D | ex.T.h.+F.c. | ex.T.h.+F.c.+2,4D |
| Control           |                     | **   | ns   | **        | **   | **        | **        | **             | *       | **           | **           | **                |
| 2,4D              | **                  |      | **   | *         | **   | **        | **        | *              | **      | **           | **           | **                |
| T.h.              | ns                  | **   |      | **        | **   | **        | **        | **             | **      | **           | **           | **                |
| T.h.+2,4D         | **                  | *    | **   |           | **   | **        | **        | ns             | **      | **           | **           | ns                |
| F.c.              | **                  | **   | **   | **        |      | **        | ns        | **             | **      | **           | **           | **                |
| F.c.+2,4D         | **                  | **   | **   | **        | **   |           | **        | **             | **      | ns           | *            | **                |
| T.h.+F.c.         | **                  | **   | **   | **        | ns   | **        |           | **             | **      | **           | **           | **                |
| T.h.+F.c.+2,4D    | **                  | *    | **   | ns        | **   | **        | **        |                | **      | **           | **           | *                 |
| ex.T.h.           | *                   | **   | *    | **        | **   | **        | **        | **             |         | **           | **           | **                |
| ex.T.h.+2,4D      | **                  | **   | **   | **        | **   | ns        | **        | **             | **      |              | **           | **                |
| ex.T.h.+F.c.      | **                  | ns   | **   | **        | **   | *         | **        | **             | **      | **           |              | ns                |
| ex.T.h.+F.c.+2,4D | **                  | ns   | **   | ns        | **   | **        | **        | *              | **      | **           | ns           |                   |

**Table S6.** Comparison of ANOVA Tukey post-hoc results for oxylin with treatment as a factor, (T.h. – *Trichoderma harzianum*, F.c.- *Fusarium culmorum*, ex. T.h – *T. harzianum* extracellular metabolites treated wheat seeds), p significance was shown: \*\* -  $p \leq 0.001$ , \* -  $p \leq 0.01$ , ns – not significant

|                   | 9-Hotre (shoot) |      |      |           |      |           |           |                |         |              |              |                   |
|-------------------|-----------------|------|------|-----------|------|-----------|-----------|----------------|---------|--------------|--------------|-------------------|
|                   | Control         | 2,4D | T.h. | T.h.+2,4D | F.c. | F.c.+2,4D | T.h.+F.c. | T.h.+F.c.+2,4D | ex.T.h. | ex.T.h.+2,4D | ex.T.h.+F.c. | ex.T.h.+F.c.+2,4D |
| Control           |                 | *    | *    | *         | *    | ns        | *         | *              | *       | *            | *            | *                 |
| 2,4D              | *               |      | *    | ns        | *    | *         | ns        | *              | *       | *            | *            | *                 |
| T.h.              | *               | *    |      | *         | *    | *         | *         | *              | ns      | *            | *            | *                 |
| T.h.+2,4D         | *               | ns   | *    |           | *    | *         | ns        | *              | *       | *            | *            | *                 |
| F.c.              | *               | *    | *    | *         |      | *         | ns        | *              | *       | ns           | *            | *                 |
| F.c.+2,4D         | ns              | *    | *    | *         | *    |           | *         | *              | *       | *            | *            | *                 |
| T.h.+F.c.         | *               | ns   | *    | ns        | ns   | *         |           | *              | *       | *            | *            | *                 |
| T.h.+F.c.+2,4D    | *               | *    | *    | *         | *    | *         | *         |                | ns      | *            | *            | *                 |
| ex.T.h.           | *               | *    | ns   | *         | *    | *         | *         | ns             |         | *            | *            | *                 |
| ex.T.h.+2,4D      | *               | *    | *    | *         | ns   | *         | *         | *              | *       |              | *            | *                 |
| ex.T.h.+F.c.      | *               | *    | *    | *         | *    | *         | *         | *              | *       | *            |              | ns                |
| ex.T.h.+F.c.+2,4D | *               | *    | *    | *         | *    | *         | *         | *              | *       | *            | ns           |                   |
|                   |                 |      |      |           |      |           |           |                |         |              |              |                   |
|                   | 13-HODE (shoot) |      |      |           |      |           |           |                |         |              |              |                   |
|                   | Control         | 2,4D | T.h. | T.h.+2,4D | F.c. | F.c.+2,4D | T.h.+F.c. | T.h.+F.c.+2,4D | ex.T.h. | ex.T.h.+2,4D | ex.T.h.+F.c. | ex.T.h.+F.c.+2,4D |
| Control           |                 | *    | *    | *         | *    | ns        | ns        | *              | *       | ns           | *            | *                 |
| 2,4D              | *               |      | *    | *         | *    | *         | *         | *              | *       | *            | *            | ns                |
| T.h.              | *               | *    |      | ns        | *    | *         | *         | *              | ns      | *            | *            | *                 |
| T.h.+2,4D         | *               | *    | ns   |           | *    | *         | *         | ns             | ns      | *            | *            | *                 |
| F.c.              | *               | *    | *    | *         |      | *         | *         | *              | *       | *            | *            | *                 |
| F.c.+2,4D         | ns              | *    | *    | *         | *    |           | ns        | *              | *       | ns           | ns           | *                 |
| T.h.+F.c.         | ns              | *    | *    | *         | *    | ns        |           | *              | *       | ns           | ns           | *                 |
| T.h.+F.c.+2,4D    | *               | *    | *    | ns        | *    | *         | *         |                | ns      | *            | *            | *                 |
| ex.T.h.           | *               | *    | ns   | ns        | *    | *         | *         | ns             |         | *            | *            | *                 |
| ex.T.h.+2,4D      | ns              | *    | *    | *         | *    | ns        | ns        | *              | *       |              | ns           | *                 |
| ex.T.h.+F.c.      | *               | *    | *    | *         | *    | ns        | ns        | *              | *       | ns           |              | *                 |

|                       |                  |      |      |           |      |           |           |                |         |              |              |                       |
|-----------------------|------------------|------|------|-----------|------|-----------|-----------|----------------|---------|--------------|--------------|-----------------------|
| ex.T.h.+F.c.+2,4<br>D | *                | ns   | *    | *         | *    | *         | *         | *              | *       | *            | *            | *                     |
|                       | 9-HODE (shoot)   |      |      |           |      |           |           |                |         |              |              |                       |
|                       | Control          | 2,4D | T.h. | T.h.+2,4D | F.c. | F.c.+2,4D | T.h.+F.c. | T.h.+F.c.+2,4D | ex.T.h. | ex.T.h.+2,4D | ex.T.h.+F.c. | ex.T.h.+F.c.+2,4<br>D |
| Control               |                  | *    | *    | *         | *    | *         | *         | *              | *       | *            | *            | ns                    |
| 2,4D                  | *                |      | *    | *         | *    | *         | *         | *              | *       | *            | *            | *                     |
| T.h.                  | *                | *    |      | ns        | *    | *         | *         | ns             | ns      | *            | ns           | *                     |
| T.h.+2,4D             | *                | *    | ns   |           | *    | ns        | *         | ns             | ns      | *            | ns           | *                     |
| F.c.                  | *                | *    | *    | *         |      | *         | *         | *              | *       | *            | *            | *                     |
| F.c.+2,4D             | *                | *    | *    | ns        | *    |           | *         | ns             | ns      | ns           | ns           | *                     |
| T.h.+F.c.             | *                | *    | *    | *         | *    | *         |           | *              | *       | ns           | *            | *                     |
| T.h.+F.c.+2,4D        | *                | *    | ns   | ns        | *    | ns        | *         |                | ns      | *            | ns           | *                     |
| ex.T.h.               | *                | *    | ns   | ns        | *    | ns        | *         | ns             |         | *            | ns           | *                     |
| ex.T.h.+2,4D          | *                | *    | *    | *         | *    | ns        | ns        | *              | *       |              | *            | *                     |
| ex.T.h.+F.c.          | *                | *    | ns   | ns        | *    | ns        | *         | ns             | ns      | *            |              | *                     |
| ex.T.h.+F.c.+2,4<br>D | ns               | *    | *    | *         | *    | *         | *         | *              | *       | *            | *            |                       |
|                       | 13-Hotre (shoot) |      |      |           |      |           |           |                |         |              |              |                       |
|                       | Control          | 2,4D | T.h. | T.h.+2,4D | F.c. | F.c.+2,4D | T.h.+F.c. | T.h.+F.c.+2,4D | ex.T.h. | ex.T.h.+2,4D | ex.T.h.+F.c. | ex.T.h.+F.c.+2,4<br>D |
| Control               |                  | ns   | *    | ns        | *    | ns        | *         | *              | *       | *            | *            | ns                    |
| 2,4D                  | ns               |      | *    | ns        | *    | ns        | *         | *              | *       | *            | *            | ns                    |
| T.h.                  | *                | *    |      | *         | *    | ns        | ns        | ns             | *       | ns           | ns           | *                     |
| T.h.+2,4D             | ns               | ns   | *    |           | *    | ns        | *         | *              | *       | *            | *            | ns                    |
| F.c.                  | *                | *    | *    | *         |      | *         | *         | *              | *       | *            | *            | *                     |
| F.c.+2,4D             | ns               | ns   | ns   | ns        | *    |           | *         | *              | *       | *            | *            | ns                    |
| T.h.+F.c.             | *                | *    | ns   | *         | *    | *         |           | ns             | ns      | ns           | ns           | *                     |
| T.h.+F.c.+2,4D        | *                | *    | ns   | *         | *    | *         | ns        |                | *       | ns           | ns           | *                     |
| ex.T.h.               | *                | *    | *    | *         | *    | *         | ns        | *              |         | ns           | ns           | *                     |
| ex.T.h.+2,4D          | *                | *    | ns   | *         | *    | *         | ns        | ns             | ns      |              | ns           | *                     |
| ex.T.h.+F.c.          | *                | *    | ns   | *         | *    | *         | ns        | ns             | ns      | ns           |              | *                     |
| ex.T.h.+F.c.+2,4<br>D | ns               | ns   | *    | ns        | *    | ns        | *         | *              | *       | *            | *            |                       |

| 9Hotre (root)     |         |      |      |           |      |           |           |                |         |              |              |                   |
|-------------------|---------|------|------|-----------|------|-----------|-----------|----------------|---------|--------------|--------------|-------------------|
|                   | Control | 2,4D | T.h. | T.h.+2,4D | F.c. | F.c.+2,4D | T.h.+F.c. | T.h.+F.c.+2,4D | ex.T.h. | ex.T.h.+2,4D | ex.T.h.+F.c. | ex.T.h.+F.c.+2,4D |
| Control           |         | *    | *    | ns        | *    | ns        | *         | *              | *       | *            | *            | *                 |
| 2,4D              | *       |      | *    | ns        | *    | *         | *         | ns             | *       | *            | *            | ns                |
| T.h.              | *       | *    |      | *         | *    | *         | *         | *              | *       | *            | *            | *                 |
| T.h.+2,4D         | ns      | ns   | *    |           | *    | ns        | *         | ns             | *       | *            | *            | ns                |
| F.c.              | *       | *    | *    | *         |      | *         | *         | *              | ns      | *            | *            | *                 |
| F.c.+2,4D         | ns      | *    | *    | ns        | *    |           | *         | *              | *       | *            | *            | *                 |
| T.h.+F.c.         | *       | *    | *    | *         | *    | *         |           | *              | *       | *            | *            | *                 |
| T.h.+F.c.+2,4D    | *       | ns   | *    | ns        | *    | *         | *         |                | *       | *            | *            | ns                |
| ex.T.h.           | *       | *    | *    | *         | ns   | *         | *         | *              |         | *            | *            | *                 |
| ex.T.h.+2,4D      | *       | *    | *    | *         | *    | *         | *         | *              | *       |              | ns           | ns                |
| ex.T.h.+F.c.      | *       | *    | *    | *         | *    | *         | *         | *              | *       | ns           |              | *                 |
| ex.T.h.+F.c.+2,4D | *       | ns   | *    | ns        | *    | *         | *         | ns             | *       | ns           | *            |                   |

| 13Hode (root)     |         |      |      |           |      |           |           |                |         |              |              |                   |
|-------------------|---------|------|------|-----------|------|-----------|-----------|----------------|---------|--------------|--------------|-------------------|
|                   | Control | 2,4D | T.h. | T.h.+2,4D | F.c. | F.c.+2,4D | T.h.+F.c. | T.h.+F.c.+2,4D | ex.T.h. | ex.T.h.+2,4D | ex.T.h.+F.c. | ex.T.h.+F.c.+2,4D |
| Control           |         | *    | *    | *         | *    | ns        | *         | *              | *       | ns           | *            | *                 |
| 2,4D              | *       |      | *    | *         | ns   | *         | *         | ns             | *       | *            | *            | *                 |
| T.h.              | *       | *    |      | *         | *    | *         | *         | *              | *       | *            | *            | *                 |
| T.h.+2,4D         | *       | *    | *    |           | *    | *         | *         | *              | *       | *            | ns           | ns                |
| F.c.              | *       | ns   | *    | *         |      | *         | *         | ns             | *       | ns           | *            | *                 |
| F.c.+2,4D         | ns      | *    | *    | *         | *    |           | *         | *              | *       | ns           | *            | *                 |
| T.h.+F.c.         | *       | *    | *    | *         | *    | *         |           | *              | ns      | *            | *            | *                 |
| T.h.+F.c.+2,4D    | *       | ns   | *    | *         | ns   | *         | *         |                | *       | ns           | *            | *                 |
| ex.T.h.           | *       | *    | *    | *         | *    | *         | ns        | *              |         | *            | *            | *                 |
| ex.T.h.+2,4D      | ns      | *    | *    | *         | ns   | ns        | *         | ns             | *       |              | *            | *                 |
| ex.T.h.+F.c.      | *       | *    | *    | ns        | *    | *         | *         | *              | *       | *            |              | *                 |
| ex.T.h.+F.c.+2,4D | *       | *    | *    | ns        | *    | *         | *         | *              | *       | *            | *            |                   |

9Hode (root)



**Table S7.** Comparison of ANOVA Tukey post-hoc results for CAT and SOD with treatment as a factor, (T.h. – *Trichoderma harzianum*, F.c.- *Fusarium culmorum*, ex. T.h – *T. harzianum* extracellular metabolites treated wheat seeds), p significance was shown: \* -  $p \leq 0.05$  \*\* -  $p \leq 0.01$ , \*\*\* -  $p \leq 0.001$ , ns – not significant.

|                   | ANOVA for CAT (shoot) |       |     |           |      |            |           |                 |        |              |             |                   |
|-------------------|-----------------------|-------|-----|-----------|------|------------|-----------|-----------------|--------|--------------|-------------|-------------------|
|                   | Control               | 2,4-D | T.h | T.h 2,4-D | F.c. | F.c. 2,4-D | T.h. F.c. | T.h. F.c. 2,4-D | e.T.h. | e.T.h. 2,4-D | e.T.h. F.c. | e.T.h. F.c. 2,4-D |
| Control           |                       | **    | ns  | *         | ***  | ***        | ***       | ***             | ***    | ***          | ***         | ***               |
| 2,4-D             | **                    |       | ns  | ns        | ***  | ***        | ns        | ***             | ns     | ns           | ns          | ***               |
| T.h               | ns                    | ns    |     | ns        | ***  | ***        | ***       | ***             | **     | **           | *           | ***               |
| T.h 2,4-D         | *                     | ns    | ns  |           | ***  | ***        | ***       | ***             | **     | **           | ns          | ***               |
| F.c.              | ***                   | ***   | *** | ***       |      | ns         | ns        | ***             | **     | *            | **          | ns                |
| F.c. 2,4-D        | ***                   | ***   | *** | ***       | ns   |            | ***       | *               | ***    | ***          | ***         | ns                |
| T.h. F.c.         | ***                   | ns    | *** | ***       | ns   | ***        |           | ***             | ns     | ns           | ns          | ***               |
| T.h. F.c. 2,4-D   | ***                   | ***   | *** | ***       | ***  | *          | ***       |                 | ***    | ***          | ***         | ns                |
| e.T.h.            | ***                   | ns    | **  | **        | **   | ***        | ns        | ***             |        | ns           | ns          | ***               |
| e.T.h. 2,4-D      | ***                   | ns    | **  | **        | *    | ***        | ns        | ***             | ns     |              | ns          | ***               |
| e.T.h. F.c.       | ***                   | ns    | *   | ns        | **   | ***        | ns        | ***             | ns     | ns           |             | ***               |
| e.T.h. F.c. 2,4-D | ***                   | ***   | *** | ***       | ns   | ns         | ***       | ns              | ***    | ***          | ***         |                   |

  

|                 | ANOVA for CAT (root) |       |     |           |      |            |           |                 |        |              |             |                   |
|-----------------|----------------------|-------|-----|-----------|------|------------|-----------|-----------------|--------|--------------|-------------|-------------------|
|                 | Control              | 2,4-D | T.h | T.h 2,4-D | F.c. | F.c. 2,4-D | T.h. F.c. | T.h. F.c. 2,4-D | e.T.h. | e.T.h. 2,4-D | e.T.h. F.c. | e.T.h. F.c. 2,4-D |
| Control         |                      | ns    | ns  | ns        | ns   | ***        | ns        | ***             | ns     | *            | ns          | ns                |
| 2,4-D           | ns                   |       | ns  | ns        | ns   | ***        | ns        | **              | ns     | ns           | ns          | ns                |
| T.h             | ns                   | ns    |     | ns        | ns   | ***        | ns        | **              | ns     | ns           | ns          | ns                |
| T.h 2,4-D       | ns                   | ns    | ns  |           | ns   | ***        | ns        | ***             | ns     | *            | ns          | ns                |
| F.c.            | ns                   | ns    | ns  | ns        |      | ***        | ns        | *               | ns     | ns           | ns          | ns                |
| F.c. 2,4-D      | ***                  | ***   | *** | ***       | ***  |            | ***       | ns              | **     | *            | ***         | ***               |
| T.h. F.c.       | ns                   | ns    | ns  | ns        | ns   | ***        |           | ***             | ns     | **           | ns          | *                 |
| T.h. F.c. 2,4-D | ***                  | **    | **  | ***       | *    | ns         | ***       |                 | **     | ns           | ***         | ns                |

|                   |    |    |    |    |    |     |    |    |    |    |    |    |
|-------------------|----|----|----|----|----|-----|----|----|----|----|----|----|
| e.T.h.            | ns | ns | ns | ns | ns | *** | ns | ** |    | ns | ns | ns |
| e.T.h. 2,4-D      | *  | ns | ns | *  | ns | *   | ** | ns | ns |    | ns | ns |
| e.T.h. F.c.       | ns | ns | ns | ns | ns | *** | ns | ** | ns | ns |    | ns |
| e.T.h. F.c. 2,4-D | ns | ns | ns | ns | ns | **  | *  | ns | ns | ns | ns |    |

| ANOVA for SOD (shoot) |         |       |     |           |      |            |           |                 |        |              |             |                   |
|-----------------------|---------|-------|-----|-----------|------|------------|-----------|-----------------|--------|--------------|-------------|-------------------|
|                       | Control | 2,4-D | T.h | T.h 2,4-D | F.c. | F.c. 2,4-D | T.h. F.c. | T.h. F.c. 2,4-D | e.T.h. | e.T.h. 2,4-D | e.T.h. F.c. | e.T.h. F.c. 2,4-D |
| Control               |         | ns    | ns  | ns        | ns   | ***        | ns        | ns              | ns     | ns           | ns          | ***               |
| 2,4-D                 | ns      |       | ns  | ns        | ns   | ***        | *         | ns              | ns     | ns           | ns          | ***               |
| T.h                   | ns      | ns    |     | ns        | ns   | ***        | ns        | ns              | *      | ns           | ns          | ***               |
| T.h 2,4-D             | ns      | ns    | ns  |           | ns   | ***        | ns        | ns              | *      | ns           | ns          | ***               |
| F.c.                  | ns      | ns    | ns  | ns        |      | ***        | ns        | ns              | ns     | ns           | ns          | ***               |
| F.c. 2,4-D            | ***     | ***   | *** | ***       | ***  |            | ***       | ***             | **     | ***          | ***         | ns                |
| T.h. F.c.             | ns      | *     | ns  | ns        | ns   | ***        |           | ns              | **     | ns           | ns          | ***               |
| T.h. F.c. 2,4-D       | ns      | ns    | ns  | ns        | ns   | ***        | ns        |                 | ns     | ns           | ns          | ***               |
| e.T.h.                | ns      | ns    | *   | ns        | ns   | **         | **        | ns              |        | ns           | ns          | ***               |
| e.T.h. 2,4-D          | ns      | ns    | ns  | ns        | ns   | ***        | ns        | ns              | ns     |              | ns          | ***               |
| e.T.h. F.c.           | ns      | ns    | ns  | ns        | ns   | ***        | ns        | ns              | ns     | ns           |             | ***               |
| e.T.h. F.c. 2,4-D     | ***     | ***   | *** | ***       | ***  | ns         | ***       | ***             | ***    | ***          | ***         |                   |

| ANOVA for SOD (root) |         |       |     |           |      |            |           |                 |        |              |             |                   |
|----------------------|---------|-------|-----|-----------|------|------------|-----------|-----------------|--------|--------------|-------------|-------------------|
|                      | Control | 2,4-D | T.h | T.h 2,4-D | F.c. | F.c. 2,4-D | T.h. F.c. | T.h. F.c. 2,4-D | e.T.h. | e.T.h. 2,4-D | e.T.h. F.c. | e.T.h. F.c. 2,4-D |
| Control              |         | ns    | *** | **        | ***  | ***        | ***       | ns              | ns     | **           | ***         | ns                |
| 2,4-D                | ns      |       | ns  | ns        | ***  | ***        | ***       | ***             | ns     | ns           | ***         | ***               |
| T.h                  | ***     | ns    |     | ns        | ***  | ***        | ***       | ***             | ns     | ns           | ***         | ***               |
| T.h 2,4-D            | **      | ns    | ns  |           | ***  | ***        | ***       | ***             | ns     | ns           | ***         | ***               |
| F.c.                 | ***     | ***   | *** | ***       |      | ns         | ns        | ***             | ***    | ***          | ***         | ***               |
| F.c. 2,4-D           | ***     | ***   | *** | ***       | ns   |            | ***       | ***             | ***    | ***          | ***         | ***               |
| T.h. F.c.            | ***     | ***   | *** | ***       | ns   | ***        |           | ***             | ***    | ***          | ***         | ***               |
| T.h. F.c. 2,4-D      | ns      | *     | *** | ***       | ***  | ***        | ***       |                 | ***    | ***          | ***         | ns                |
| e.T.h.               | ns      | ns    | ns  | ns        | ***  | ***        | ***       | ***             |        | ns           | ***         | ***               |
| e.T.h. 2,4-D         | **      | ns    | ns  | ns        | ***  | ***        | ***       | ***             | ns     |              | ***         | ***               |
| e.T.h. F.c.          | ***     | ***   | *** | ***       | ***  | ***        | ***       | ***             | ***    | ***          |             | *                 |
| e.T.h. F.c. 2,4-D    | ns      | ***   | *** | ***       | ***  | ***        | ***       | ns              | ***    | ***          | *           |                   |

**Table S8.** Comparison of ANOVA Tukey post-hoc results for ZEA with treatment as a factor, (T.h. – *Trichoderma harzianum*, F.c.- *Fusarium culmorum*, ex. T.h – *T. harzianum* extracellular metabolites treated wheat seeds), p significance was shown: \*  $p \leq 0.01$ , \*\*  $p \leq 0.001$ , ns – not significant

|                   | ANOVA for ZEA |           |           |                |              |                   |
|-------------------|---------------|-----------|-----------|----------------|--------------|-------------------|
|                   | F.c.          | F.c.+2,4D | T.h.+F.c. | T.h.+F.c.+2,4D | ex.T.h.+F.c. | ex.T.h.+F.c.+2,4D |
| F.c.              |               | **        | *         | ns             | **           | ns                |
| F.c.+2,4D         | **            |           | **        | **             | **           | *                 |
| T.h.+F.c.         | *             | **        |           | ns             | **           | ns                |
| T.h.+F.c.+2,4D    | ns            | **        | ns        |                | **           | ns                |
| ex.T.h.+F.c.      | **            | **        | **        | **             |              | **                |
| ex.T.h.+F.c.+2,4D | ns            | *         | ns        | ns             | **           |                   |

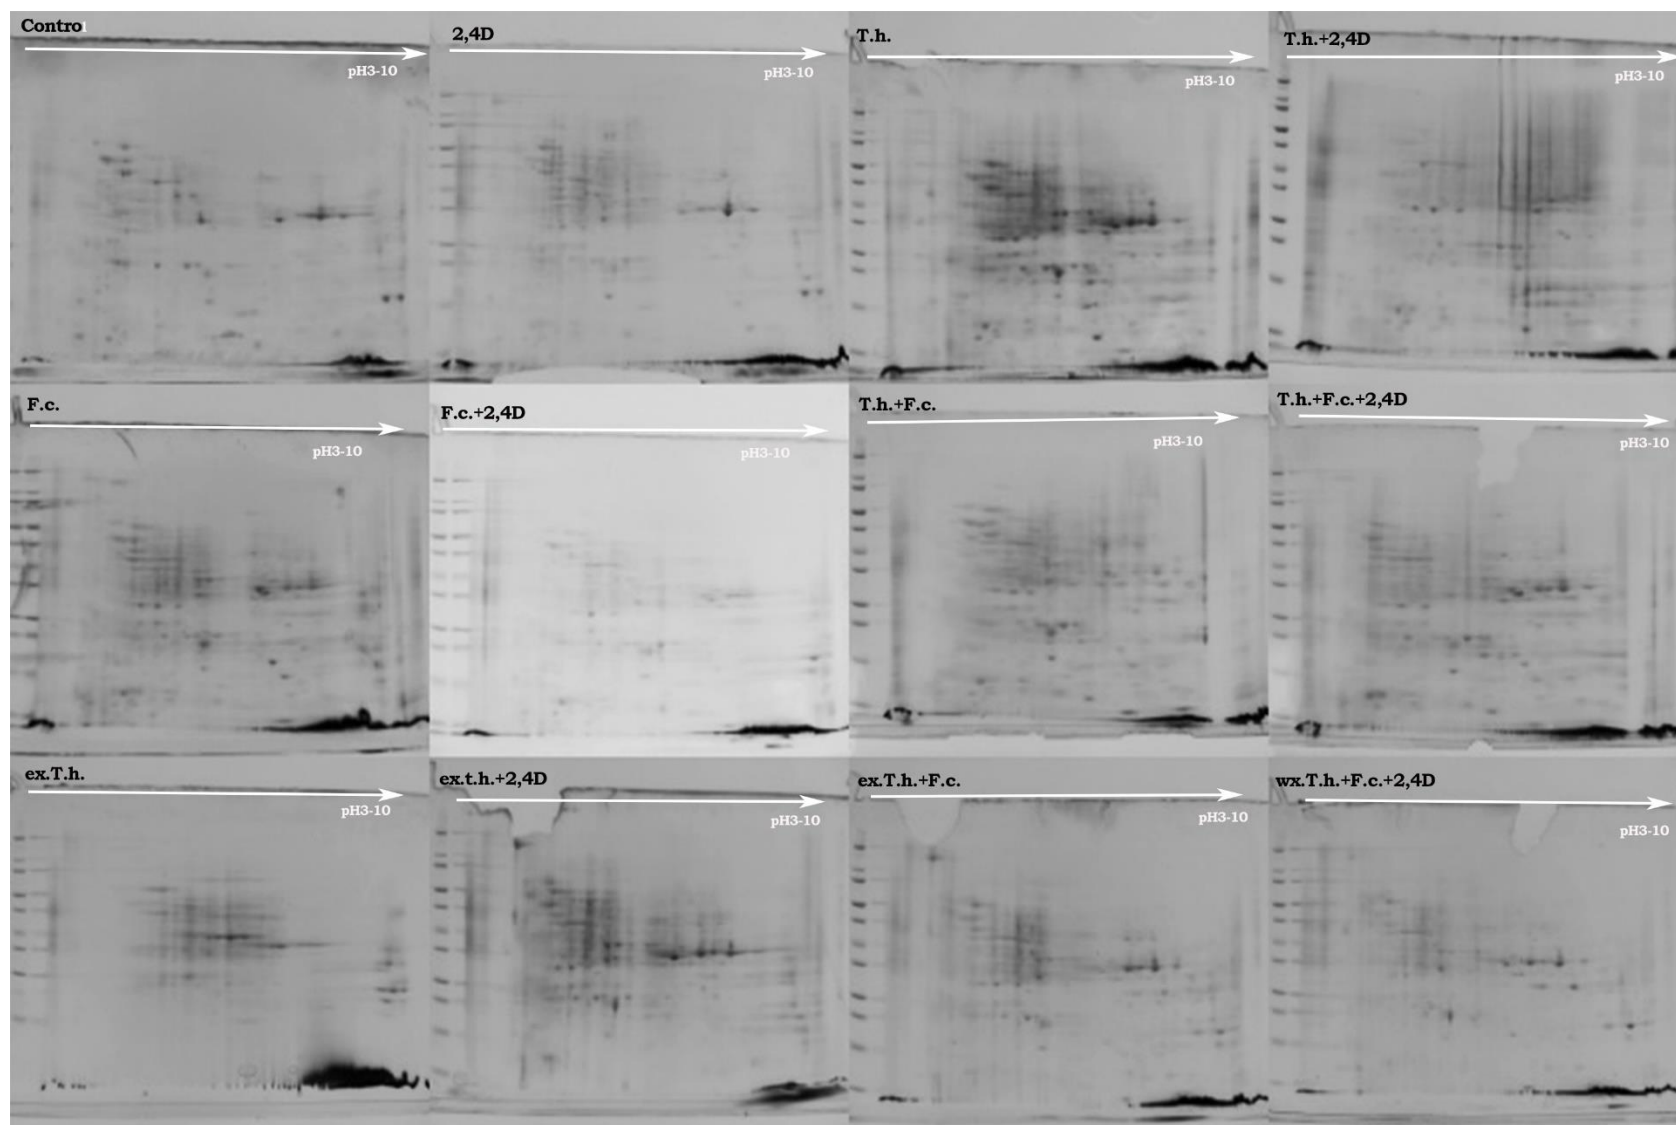

**Figure S1.** 2-D SDS PAGE protein profile from root material (Control; 2,4D; *T. harzianum* inoculated; *T. harzianum* + 2,4D; *F. culmorum* inoculated; *F. culmorum* + 2,4D; *T. harzianum* + *F. culmorum*; *T. harzianum* + *F. culmorum* + 2,4D; treated with extracellular extract *T. harzianum*; with extracellular extract *T. harzianum* + 2,4D; with extracellular extract *T. harzianum* + *F. culmorum*; extracellular extract *T. harzianum* + *F. culmorum* + 2,4D).

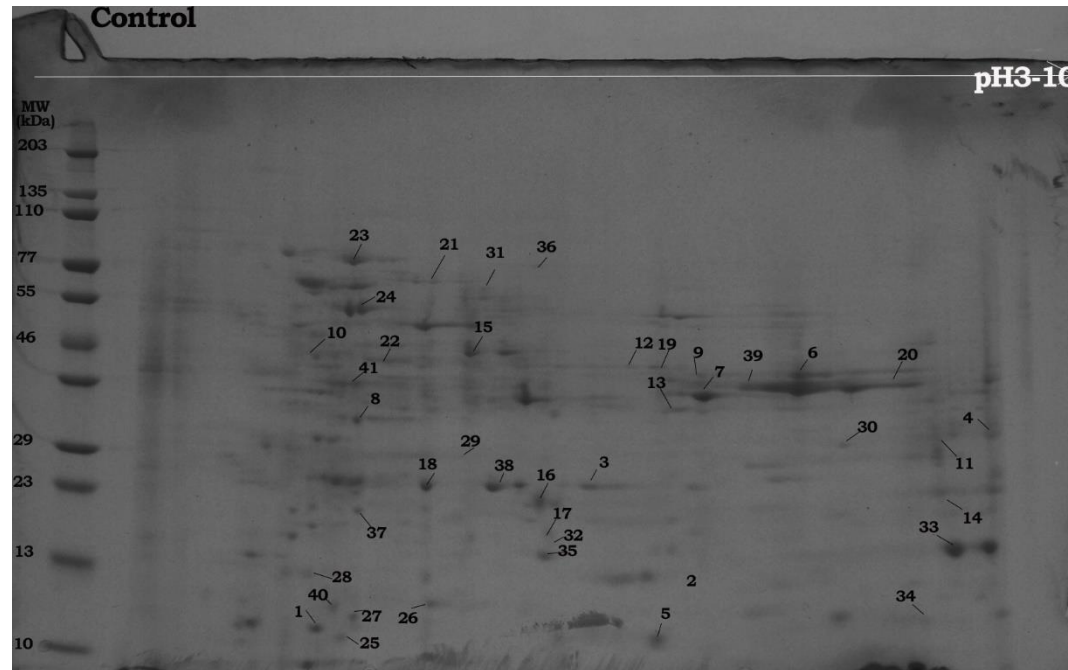

**Figure S2.** The spots analyzed during the proteomic study from root material, applied to a control gel, as an example.

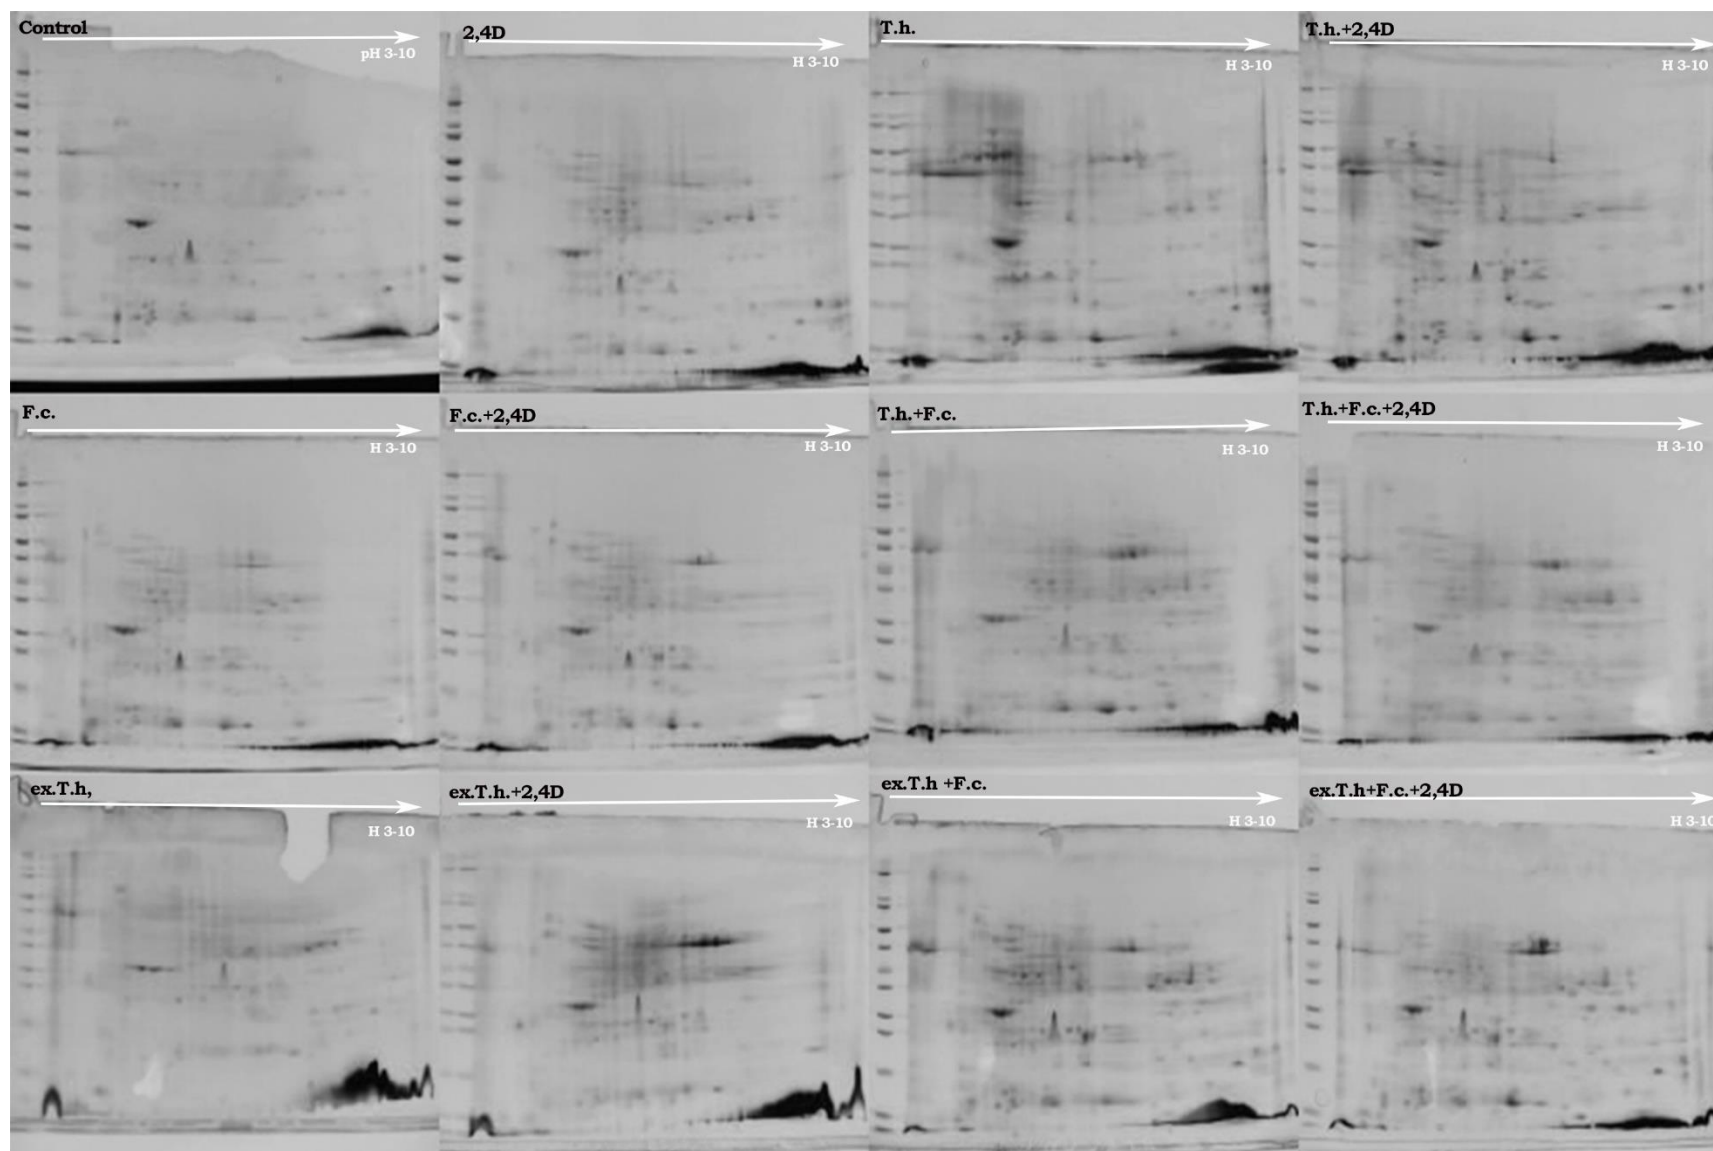

**Figure S3.** 2-D SDS PAGE protein profile from shoot material (Control; 2,4D; *T. harzianum* inoculated; *T. harzianum* + 2,4D; *F. culmorum* inoculated; *F. culmorum* + 2,4D; *T. harzianum* + *F. culmorum*; *T. harzianum* + *F. culmorum* + 2,4D; treated with extracellular extract *T. harzianum*; with extracellular extract *T. harzianum* + 2,4D; with extracellular extract *T. harzianum* + *F. culmorum*; extracellular extract *T. harzianum* + *F. culmorum* + 2,4D).

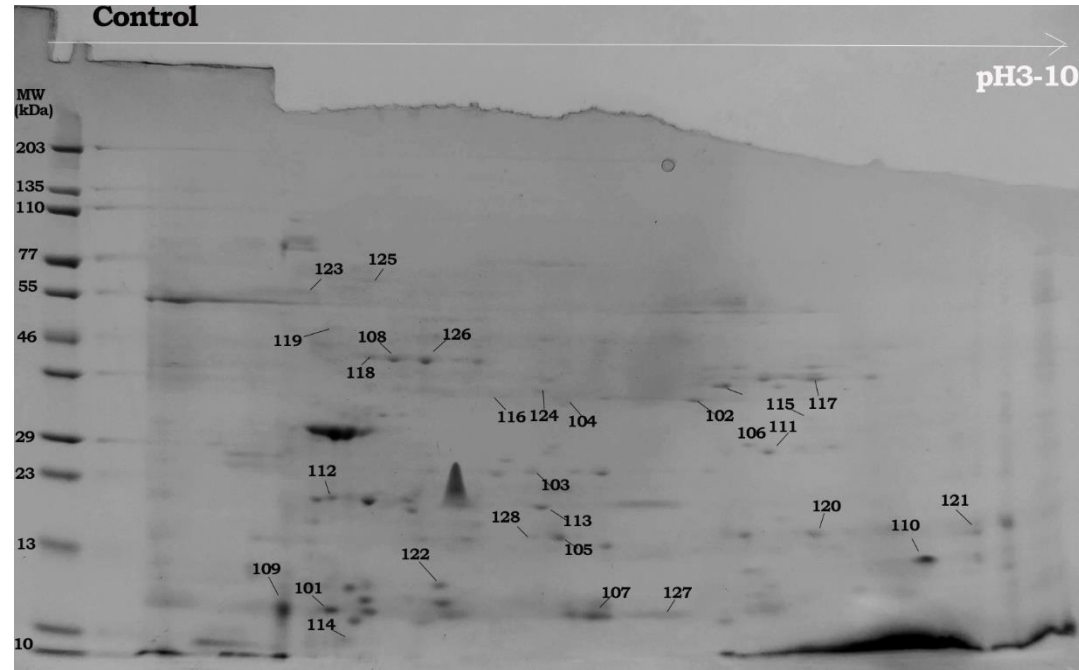

**Figure S4.** The spots analyzed during the proteomic study from shoot material, applied to a control gel, as an example.
